# Supplementary material for: Severe and Moderate Asthma Exacerbations in Asthmatic Children and Exposure to Ambient Air Pollutants
Source: MDPI journal article supplement (doi:10.3390/ijerph13080771), 2016-08-01
Supplement: s1 [file s1]

# Supplementary Materials: Severe and Moderate Asthma Exacerbations in Asthmatic Children and Exposure to Ambient Air Pollutants

Louis-Francois Tétreault, Marieve Doucet, Philippe Gamache, Michel Fournier, Allan Brand, Tom Kosatsky and Audrey Smargiassi

**Table S1.** Indirect adjustment for second hand smoke for associations between asthma exacerbation and an interquartile range increase in air pollutant levels at the birth address, form gap time models <sup>a,b</sup>.

| Pollutants                     | Sample Size | Interquartile Range    | Hazard Ratios (95% CI) |                                          |
|--------------------------------|-------------|------------------------|------------------------|------------------------------------------|
|                                |             |                        | Montreal Sub-Cohort    | Indirect Adjustment for Secondhand Smoke |
| NO <sub>2</sub> <sup>c</sup>   | 39,110      | 4.95 pp                | 1.001 (0.995–1.005)    | 1.000 (0.994–1.006)                      |
| O <sub>3</sub> <sup>d</sup>    | 25,054      | 3.85 pp                | 0.980 (0.935–1.026)    | 0.980 (0.934–1.028)                      |
| PM <sub>2.5</sub> <sup>c</sup> | 39,110      | 1.82 µg/m <sup>3</sup> | 1.019 (0.998–1.040)    | 1.017 (0.993–1.041)                      |

<sup>a</sup> Restricted to the Montreal sub-cohort; <sup>b</sup> associations stratified by age-group and adjusted for year of birth, sex, ordinal number of exacerbation and indices of social and material deprivation; <sup>c</sup> for the years 1996 to 2006 <sup>d</sup> for the years 1999 to 2006.

**Table S2.** Associations between asthma exacerbation and an interquartile range increase in air pollutants levels at the home address form gap time models excluding some health regions of Quebec <sup>a,b</sup>.

| Pollutants                     | Sample Size | Exposure at Birth      |                        | Follow-Up Specific Exposure |                        |
|--------------------------------|-------------|------------------------|------------------------|-----------------------------|------------------------|
|                                |             | Interquartile Range    | Hazard Ratios (95% CI) | Interquartile Range         | Hazard Ratios (95% CI) |
| O <sub>3</sub> <sup>c</sup>    | 101,760     | 3.85 ppb               | 0.999 (0.976–1.023)    | 3.23 ppb                    | 1.055 (1.043–1.072)    |
| PM <sub>2.5</sub> <sup>d</sup> | 140,766     | 1.82 µg/m <sup>3</sup> | 1.021 (1.012–1.027)    | 1.82 µg/m <sup>3</sup>      | 1.026 (1.017–1.031)    |

<sup>a</sup> Associations stratified by age-group and adjusted for year of birth, sex, ordinal number of exacerbation and indices of social and material deprivation; <sup>b</sup> the province of Quebec without the following social and healthcare regions: *North of Quebec, the North Shore, the Gaspésie and the Magdalene*; <sup>c</sup> for the years 1999 to 2010; <sup>d</sup> for the years 1996 to 2011.

**Table S3.** Associations between asthma exacerbation and an interquartile range increase in air pollutant levels at the birth address in non-movers, form gap time models <sup>a</sup>.

| Pollutants                     | Sample Size | Interquartile Range    | Hazard Ratios (95% CI) |
|--------------------------------|-------------|------------------------|------------------------|
| NO <sub>2</sub> <sup>b</sup>   | 4238        | 4.99 ppb               | 1.030 (0.971–1.092)    |
| O <sub>3</sub> <sup>c</sup>    | 12,466      | 3.23 ppb               | 0.973 (0.929–1.019)    |
| PM <sub>2.5</sub> <sup>d</sup> | 18,304      | 1.82 µg/m <sup>3</sup> | 1.026 (1.012–1.039)    |

<sup>a</sup> Associations stratified by age-group and adjusted for year of birth, sex, ordinal number of exacerbation and indices of social and material deprivation; <sup>b</sup> restricted to the Montreal sub-cohort, for the years 1996 to 2006 <sup>c</sup> for the years 1999 to 2010 <sup>d</sup> for the years 1996 to 2011.

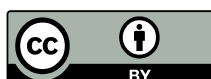

© 2016 by the authors; licensee MDPI, Basel, Switzerland. This article is an open access article distributed under the terms and conditions of the Creative Commons by Attribution (CC-BY) license (<http://creativecommons.org/licenses/by/4.0/>).
